# Supplementary material for: Factors influencing referrals amongst allied health and medical practitioners managing people with musculoskeletal conditions in Australian primary care
Source: Research Square preprint supplement (doi:10.21203/rs.3.rs-8033842/v1), 2025-12-01
Supplement: Supplementary file 1 [file ed6c757dc888305a51f65f77.docx]

**Additional File 1: Interview Guide**

We are interested in understanding more about referral practices in the management of patients with musculoskeletal conditions. So, we would like to learn more about your own experiences. But, first, I would like to get a little more information about you and your practice.

1. How long have you been working as a X (years)?
2. What is the type of setting that you do most of your work? (if not known/clear)
   1. Prompt: rural/country setting or urban/city/metropolitan setting
   2. Prompt: private practice, community, teaching, research, public hospital, private hospital, not currently working in X, retired, other (please clarify)
3. What is your main area of speciality?
4. Could you estimate what proportion of your patients have musculoskeletal conditions?

Now I would like to find out a bit more about your referral practices.

1. First, can you give me some examples of referral decisions you currently make in the management of patients with musculoskeletal conditions?
   - Who do you typically refer to? Why?
   - Can you tell me a bit more about how you make those decisions?
   - What specific information do you use to decide when to refer a patient?
   - What outcomes do you expect from referring your patient?
   - Can you tell me about any other factors apart from the patient’s condition that influence your referral practices?
2. Can you describe the referrals you get (if any) from other practitioners for patients with musculoskeletal conditions?
   - How often does this occur?
   - What types of patients are being sent to you?
   - Can you comment on the appropriateness of the types of patients being referred to you?
   - Who refers you patients? (e.g. AHP (which type); MP (which type); word of mouth; other patients)
   - What is your perception of what is expected from you? Does this depend on who is referring you the patient?
   - How do you communicate with the referring care provider? (e.g., second opinion; reassurance; guidance; shared care; take over care)

If you were designing a clinical pathway of care that optimised referral practices and behaviours between practitioners (to optimise patient experience and outcome), what would that pathway look like?”?

I am going to ask you some questions about referral recommendations that our project is investigating. Our project is investigating the role of specialist physiotherapists in the management of patients with complex presentations. Our project/team suggests three potential roles for specialist physiotherapists,

1. Shared care (collaboration with specialist MSK physiotherapist. Treatment provided by PHCP).

2. Direct treatment from a specialist MSK physiotherapist.

3. Referral to other disciplines/practitioners.

1. What are your initial thoughts on these proposed roles for specialist physiotherapists? (and/or What do you think the model overlooks/doesn’t consider?)
   - What could make referrals to specialist physiotherapists easier?

What could make referrals to specialist physiotherapists more difficult?
